# Supplementary material for: Hepatitis E Virus in Domestic Ruminants and Virus Excretion in Milk—A Potential Source of Zoonotic HEV Infection
Source: MDPI journal article supplement (doi:10.3390/v16050684), 2024-04-26
Supplement: s1 [file s1]

**Table S1.** Seroprevalence of Hepatitis E virus in ruminants

| Country             | Seroprevalence rate (%) |          |               | Ig & method of detection            | Reference |
|---------------------|-------------------------|----------|---------------|-------------------------------------|-----------|
|                     | Cattle                  | Sheep    | Goat          |                                     |           |
| <b>Brazil</b>       | 1.42%                   | 0%       | 0%            | IgG (in-house)                      | [67]      |
| <b>Bulgaria</b>     | 7.7%                    | 32.2%    | 24.4%         | total Ig (Wantai)                   | [60]      |
| <b>Burkina Faso</b> | 26.4%                   | 12.0%;   | 28.4%         | total Ig (MP Bio)                   | [76]      |
|                     | 5.1%                    | -        | -             | total Ig (MP Bio)                   | [77]      |
| <b>China</b>        | 6.5%                    | -        | 7.5 %         | total Ig (Wantai)                   | [69]      |
|                     | 18.7%                   | 12.4%    | -             | total Ig (Wantai)                   | [70]      |
|                     | 28.2%                   | -        | 10.4%         | total Ig (Wantai)                   | [71]      |
|                     | 29.35%                  | 9.8%     |               | total Ig (Wantai)                   | [72]      |
|                     | -                       | 35.20 %  | -             | total Ig (Wantai)                   | [52]      |
|                     | 25.29%                  | 9.30%    | -             | total Ig (Wantai)                   |           |
|                     | 14.87%                  |          |               |                                     | [85]      |
|                     | -                       | 28.98%   | -             | n/a                                 | [86]      |
|                     | -                       | -        | 46.7%         | IgG (Peking Dingguo)                | [59]      |
|                     | -                       | -        | 3.57% /14.29% | 2 in-house assays: IgM/ IgG         | [62]      |
|                     | 6%                      | -        | 24%           | IgG (in-house)                      | [88]      |
|                     | 6.3%                    | -        | 0%            | total Ig (in-house)                 | [92]      |
| <b>Egypt</b>        | 21.6%                   | 4.4%     | 9.4%          | IgG (in-house)                      | [75]      |
| <b>India</b>        |                         | 100%/78% | 100%/100%     | 2 in-house assays: IgG/IgG          | [89]      |
|                     | 6.9%                    | -        | 0%            | IgG (in-house)                      | [68]      |
| <b>Italy</b>        | -                       | 21.3%    | -             | total Ig (Wantai)                   | [81]      |
|                     | -                       | 21.6%;   | 11.4%         | total Ig (Wantai)                   | [82]      |
| <b>Jordan</b>       | 14.5%                   | 12.7%    | 8.3%          | total Ig (Fortress Diagnostics)     | [74]      |
| <b>Laos</b>         | 6.8%;                   | -        | 5%(1/20)      | total Ig (MP Bio)                   | [115]     |
| <b>Nigeria</b>      | 0%                      | 10.5%;   | 37.2%;        | IgG and IgM (Diagnostic Automation) | [79]      |
|                     | -                       | 31.8%    |               | IgG (ID Vet)                        | [87]      |
|                     | 0%                      | -        | 0%            | IgG (ID Vet)                        | [80]      |
| <b>Portugal</b>     | -                       | 16.6%    | -             | total Ig (Wantai)                   | [83]      |
| <b>South Korea</b>  | 0%                      | -        | -             | IgG (in-house)                      | [78]      |
| <b>Spain</b>        | 0%                      | 1.92%    | 0.6%;         | IgG (in-house)                      | [65]      |
|                     | -                       | 2.1%     | 13.8%         | total Ig (MP Bio)                   | [84]      |
| <b>Turkey</b>       | 16.5%                   | 5.0%     |               | IgG (SinoGeneClon)                  | [73]      |
| <b>USA</b>          | 20.4%                   | -        | -             | Total Ig (Wantai)                   | [66]      |
|                     | -                       | -        | 16%           | IgG (in-house)                      | [90]      |
